# Supplementary material for: Junctional adhesion molecule-A deletion increases phagocytosis and improves survival in a murine model of sepsis
Source: JCI journal article supplement (doi:10.1172/jci.insight.156255), 2022-07-12
Supplement: sd1 [file 1]

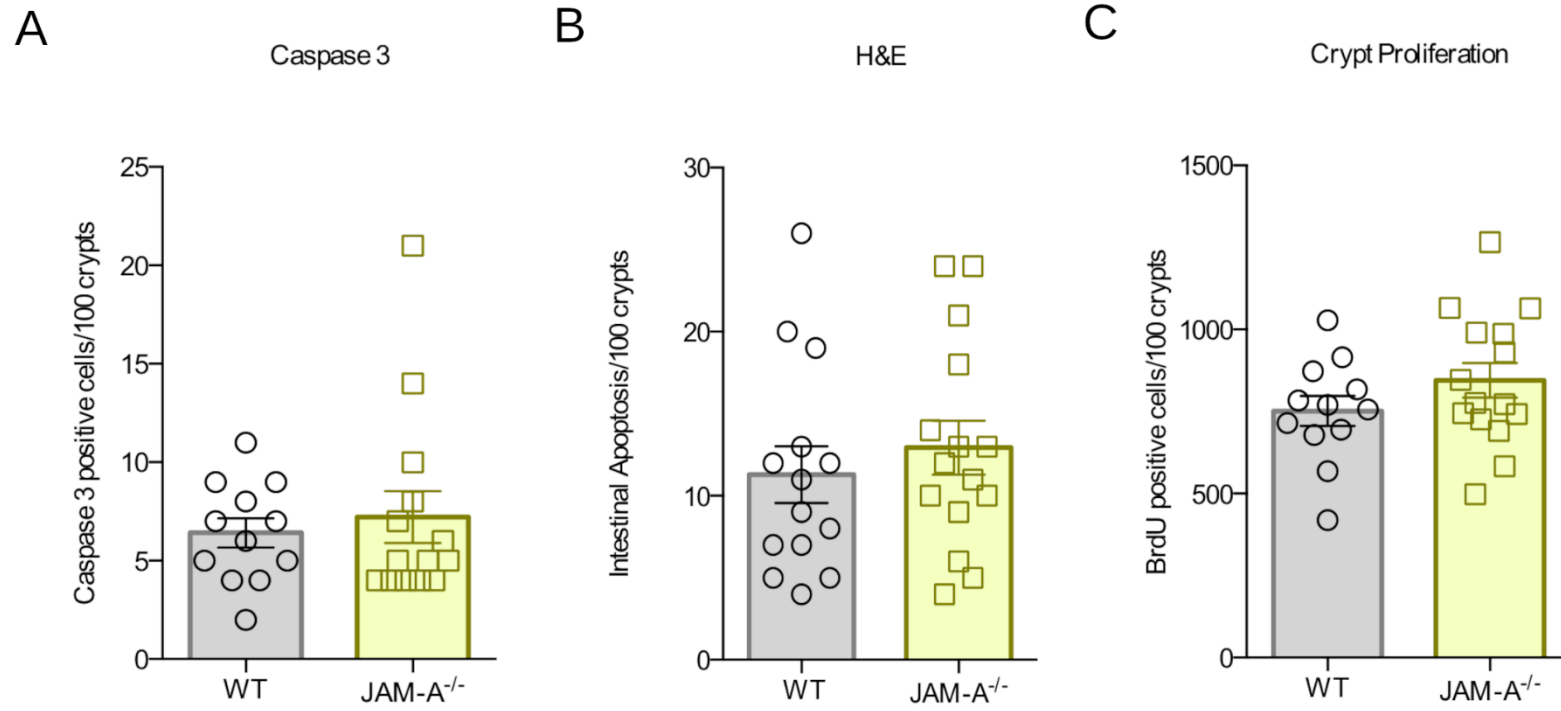

**Supplemental Figure 1 (A, B)** Apoptosis as measured by caspase 3 ( $p=0.77$ ,  $n=12$  WT,  $n=14$  JAM-A<sup>-/-</sup>) and H&E ( $p=0.49$ ,  $n=14$  WT,  $n=15$  JAM-A<sup>-/-</sup>) and **(C)** proliferation ( $p=0.20$ ,  $n=12$  WT,  $n=15$  JAM-A<sup>-/-</sup>) were similar between septic JAM-A<sup>-/-</sup> and WT mice. T-test and Mann Whitney test for A-C depending on presence of Gaussian distribution.

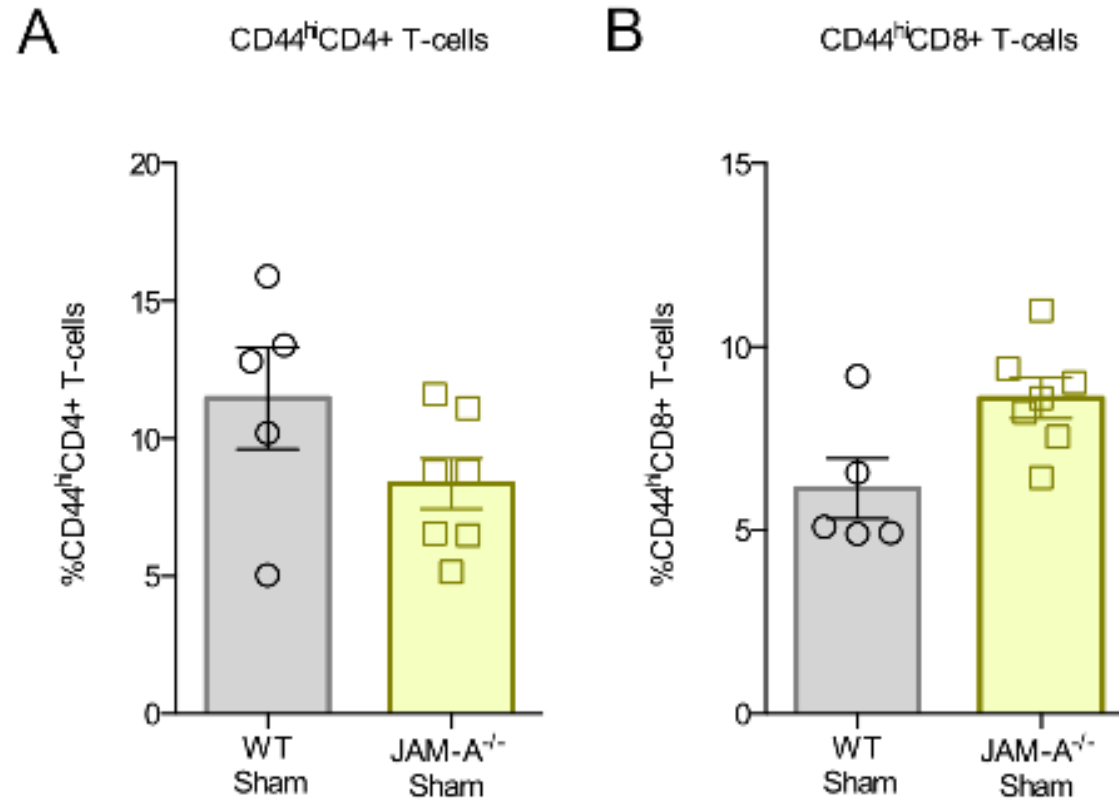

**Supplemental Figure 2 (A,B)** Percentages of both memory CD44<sup>hi</sup>CD4<sup>+</sup> T cells (p=0.20, n=5 WT, n=7 JAM-A<sup>-/-</sup>) and memory CD44<sup>hi</sup>CD8<sup>+</sup> T cells (p=0.07, n=5 WT, n=7 JAM-A<sup>-/-</sup>) were similar between septic JAM-A<sup>-/-</sup> and WT mice. Mann Whitney test for A, B.

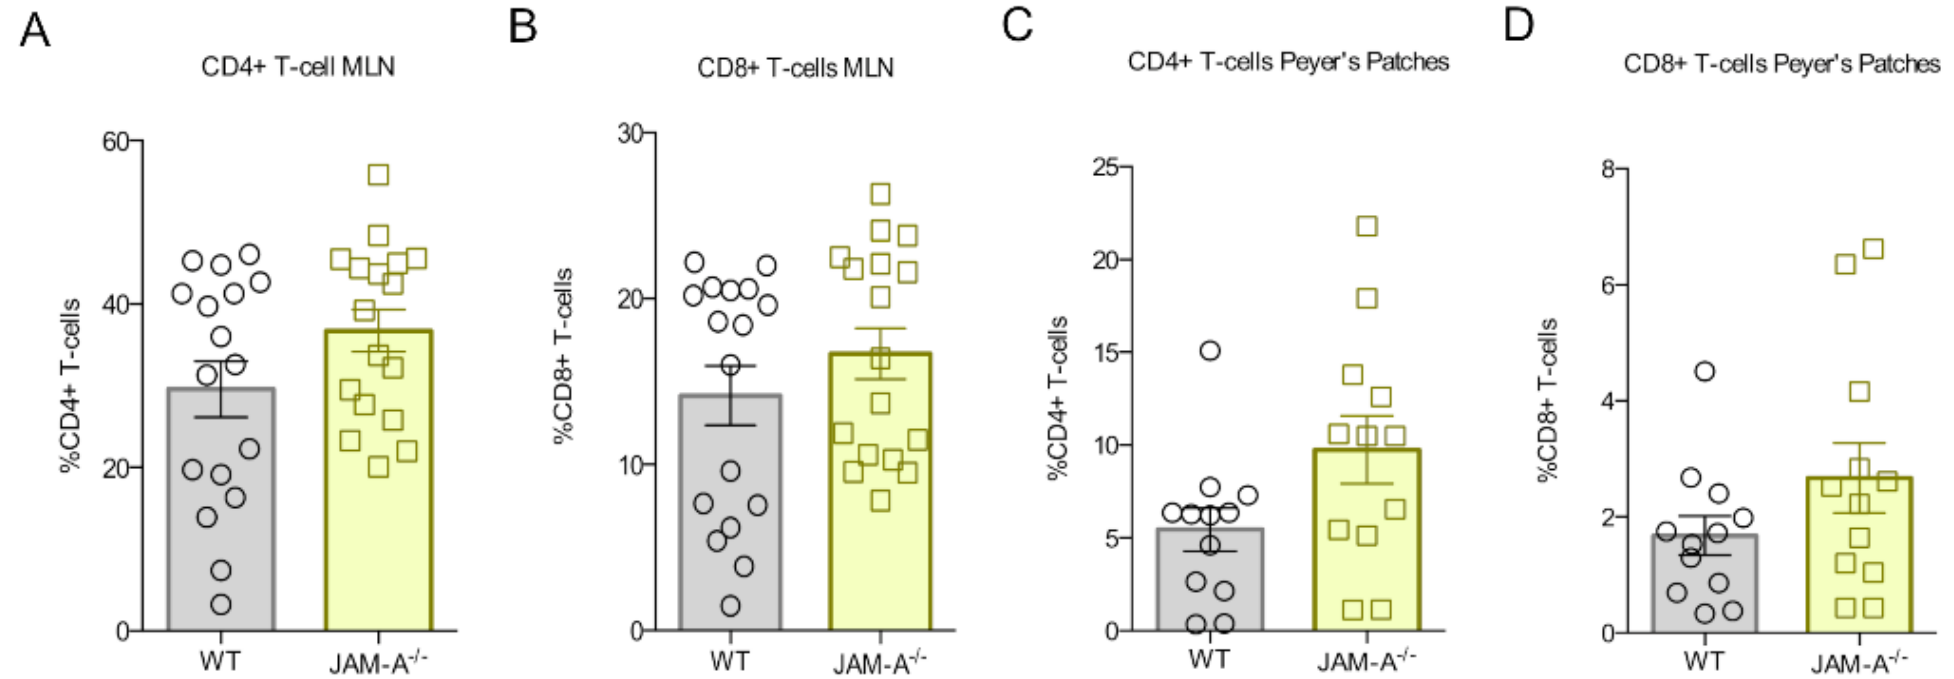

**Supplemental Figure 3 (A-D)** Percentages of bulk CD4<sup>+</sup> T cells and CD8<sup>+</sup> T cells were similar between septic JAM-A<sup>-/-</sup> and WT mice in both MLNs ( $p=0.11$  and  $p=0.16$  respectively,  $n=17$  WT,  $n=17$  JAM-A<sup>-/-</sup>) and Peyer's Patches ( $p=0.06$  and  $p=0.24$  respectively,  $n=12$  WT,  $n=12$  JAM-A<sup>-/-</sup>). T-test and Mann Whitney test for A-D depending on presence of Gaussian distribution.

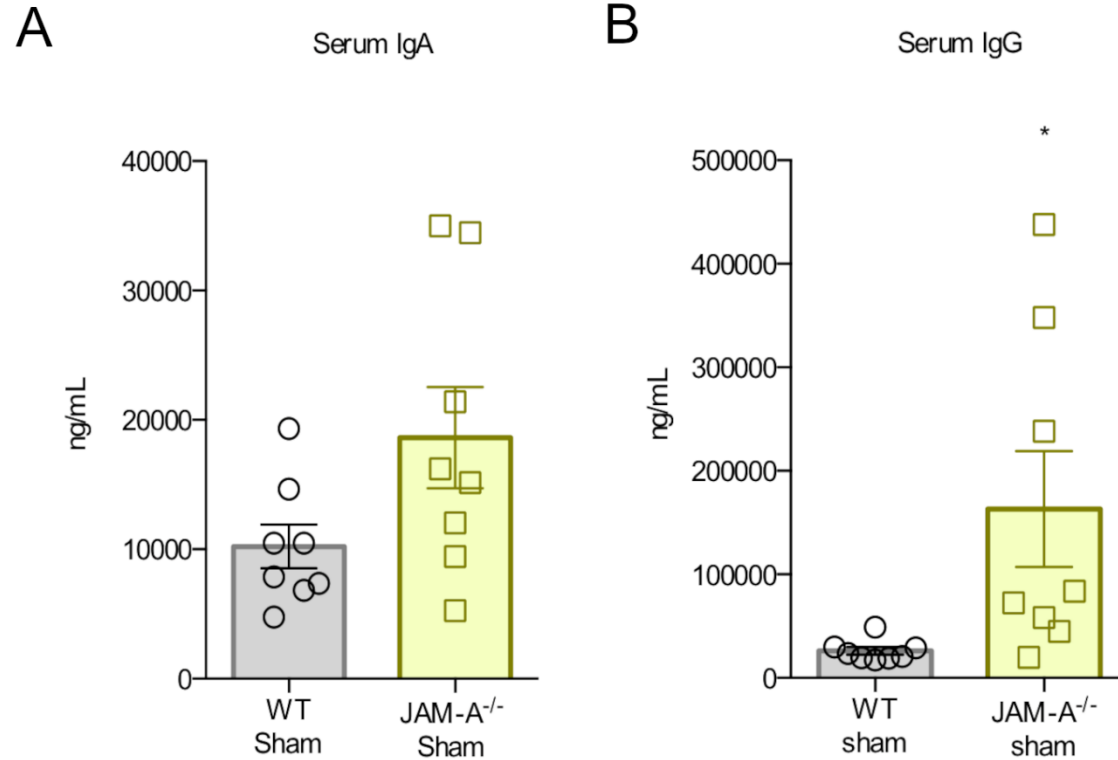

**Supplemental Figure 4 (A)** No statistically significant difference was found in serum IgA levels between sham JAM-A<sup>-/-</sup> and WT mice ( $p=0.07$ ,  $n=8$  WT,  $n=8$  JAM-A<sup>-/-</sup>). **(B)** In contrast, serum IgG levels were higher in sham JAM-A<sup>-/-</sup> mice ( $p=0.005$ ,  $n=8$  WT,  $n=8$  JAM-A<sup>-/-</sup>). T-test and Mann Whitney test for A, B depending on presence of Gaussian distribution.

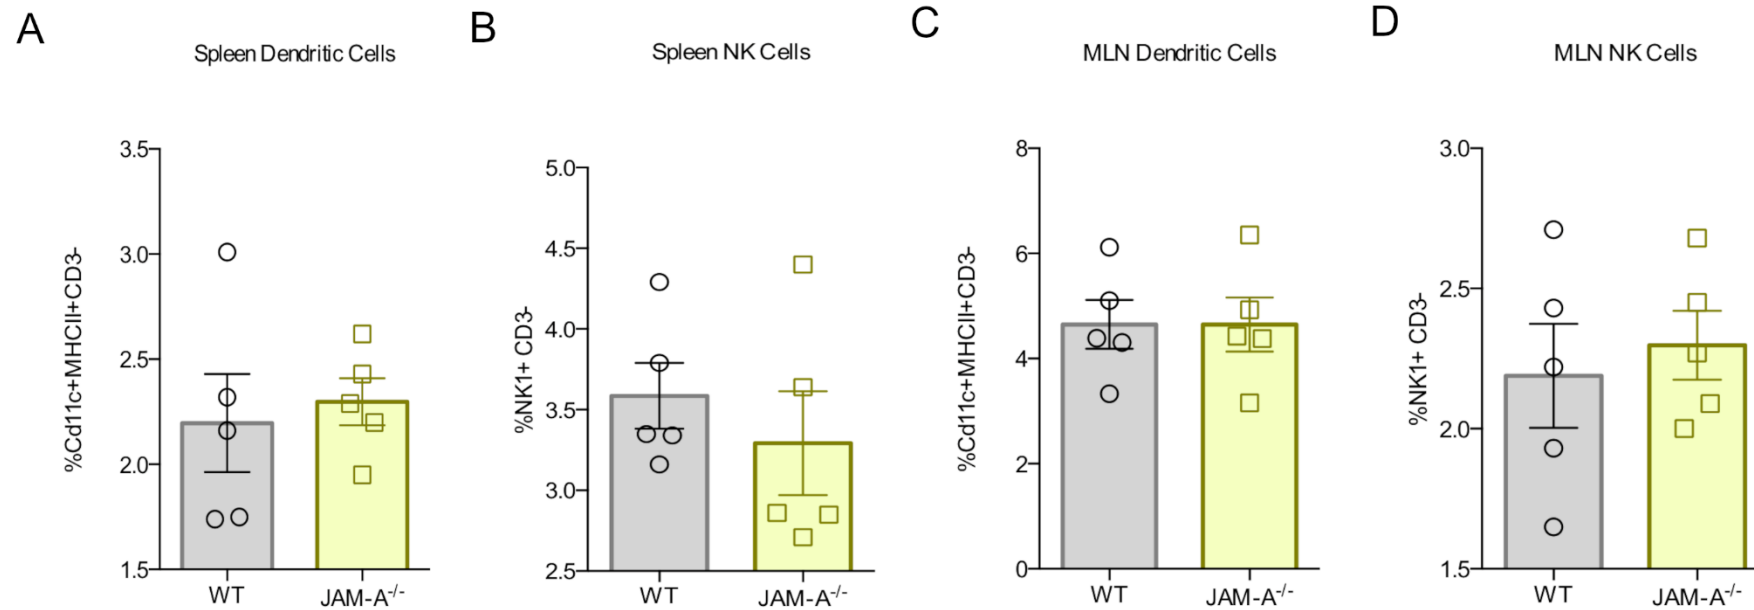

**Supplemental Figure 5 (A-D)** Percentages of dendritic cells and NK cells were similar between septic JAM-A<sup>-/-</sup> and WT mice in both spleen ( $p = 0.53$  and  $p = 0.41$ ,  $n = 5$  WT,  $n = 5$  JAM-A<sup>-/-</sup>) and MLNs ( $p = 0.94$ , and  $p = 0.67$ ,  $n = 5$  WT,  $n = 5$  JAM-A<sup>-/-</sup>). Mann Whitney test for A-D.

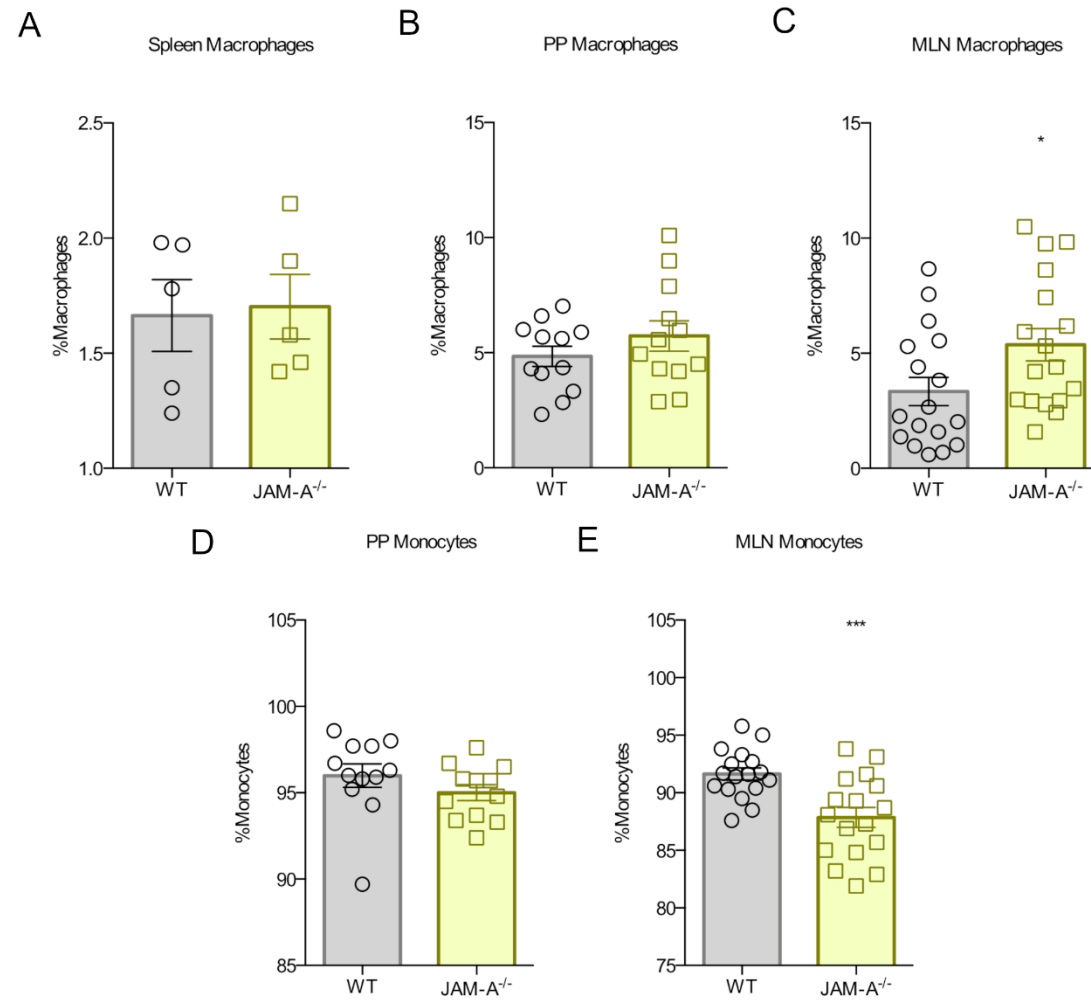

**Supplemental Figure 6 (A-C)** Percentages of macrophages were similar between septic JAM-A<sup>-/-</sup> and WT mice in spleen (p=0.84, n=5 WT, n=5 JAM-A<sup>-/-</sup>) and Peyer's Patches (p=0.27, n=12 WT, n=12 JAM-A<sup>-/-</sup>). In contrast, percentage of macrophages were higher in MLNs of JAM-A<sup>-/-</sup> mice (p =0.02, n=17 WT, n=17 JAM-A<sup>-/-</sup>). **(D, E)** Percentages of monocytes were similar between septic JAM-A<sup>-/-</sup> and WT mice in Peyer's Patches (p=0.07, n=12 WT, n=12 JAM-A<sup>-/-</sup>) whereas they were lower in knockout mice in MLNs (p=0.002, n=17 WT, n=17 JAM-A<sup>-/-</sup>). T-test and Mann Whitney test for A-E depending on presence of Gaussian distribution.

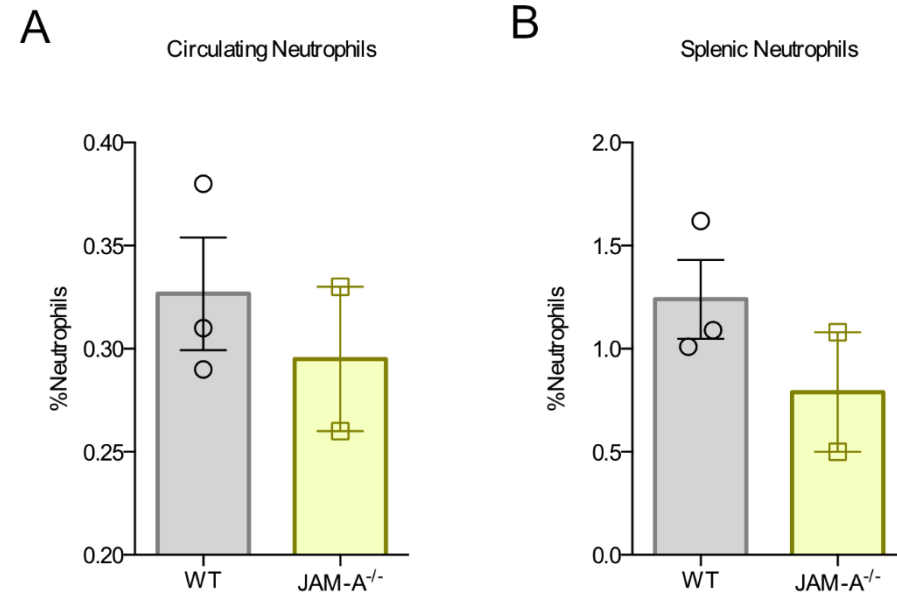

**Supplemental Figure 7 (A, B)** Ly6G depleting antibody given to WT and JAM-A<sup>-/-</sup> mice 24 hours prior to sepsis effectively depletes neutrophils in both the blood and spleen (n=3 WT, n=3 JAM-A<sup>-/-</sup>).

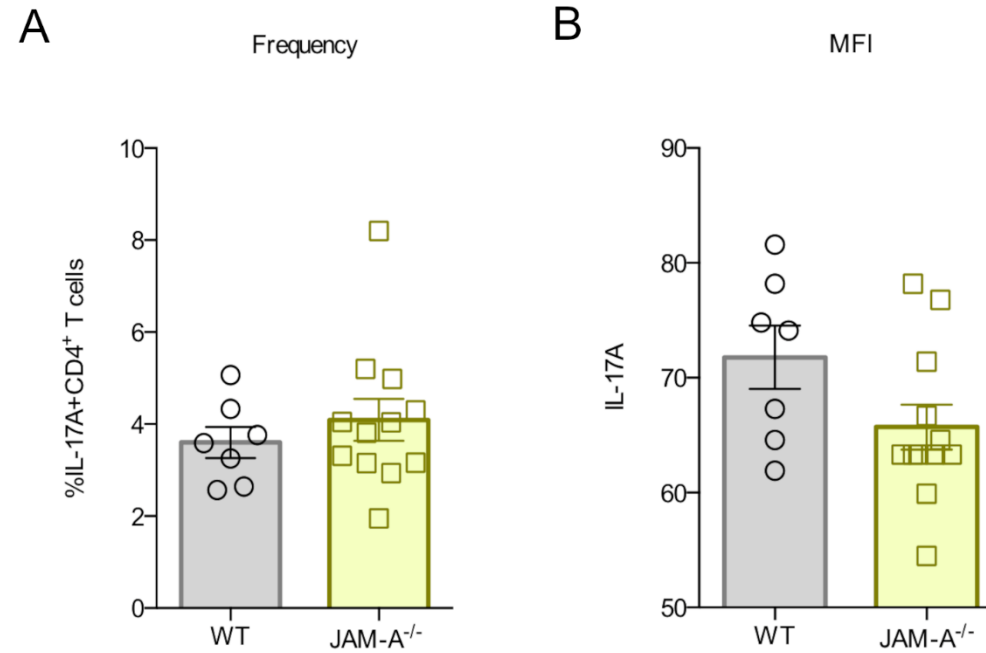

**Supplemental Figure 8 (A-B)** Frequency of splenic IL-17 was similar between septic JAM-A<sup>-/-</sup> and WT mice in bulk CD4<sup>+</sup> cells (Frequency,  $p=0.59$ , mean fluorescence intensity,  $p=0.09$ ,  $n=7$  WT,  $n=12$  JAM-A<sup>-/-</sup>). Mann Whitney test for A-B depending on presence of Gaussian distribution.
